# Supplementary material for: Intercropping of Saccharum spp. with Dictyophora indusiata: effects on microbial communities and metabolite profiles during bagasse degradation
Source: Front Microbiol. 2025 Jan 22;16:1510904. doi: 10.3389/fmicb.2025.1510904 (PMC11794506; doi:10.3389/fmicb.2025.1510904)
Supplement: Supplementary file 1 [file Table_1.xlsx]

## Sheet: Table S1
Table S1. Bacterial metabarcoding sequencing (16S rRNA) data.
SampleID	Total Tags	N50	OTUs
BA1	103675	458	3339
BA2	110231	446	3419
BA3	100958	447	3208
BA4	101068	450	3050
BA5	104147	447	3041
DIBA1	108366	444	3118
DIBA2	107775	444	2976
DIBA3	97609	443	2897
DIBA4	89416	443	2624
DIBA5	74632	442	2296

## Sheet: Table S2
Table S2. Fungal metabarcoding sequencing (ITS) data.
SampleID	Total Tags	N50	OTUs
BA1	120107	336	473
BA2	115605	335	541
BA3	123582	335	504
BA4	117387	335	505
BA5	127802	355	640
DIBA1	106008	392	499
DIBA2	100791	392	465
DIBA3	87107	392	427
DIBA4	94703	392	466
DIBA5	95277	391	679

## Sheet: Table S3
Table S3. Bacterial Alpha diversity index in bagasse from the BA and DIBA treatments.
Index	sobs	shannon	simpson	chao	ace	goods_coverage
BA1	3339	9.56596	0.99571	3483.11	3709.09	0.98177
BA2	3419	9.44693	0.994838	3553.5	3765.69	0.983407
BA3	3208	9.46859	0.994885	3367.63	3602.23	0.981994
BA4	3050	9.09517	0.992495	3188.19	3383.2	0.986526
BA5	3041	9.27979	0.994818	3181.75	3380.61	0.987689
DIBA1	3118	9.07262	0.992906	3272.81	3495.85	0.983808
DIBA2	2976	8.92549	0.991834	3141.78	3358.56	0.984567
DIBA3	2897	9.02167	0.992344	3071.9	3290.21	0.981004
DIBA4	2624	8.81413	0.991239	2762.4	2948.71	0.984262
DIBA5	2296	8.60963	0.990165	2485.18	2684.48	0.978904

## Sheet: Table S4
Table S4. Fungal Alpha diversity index in bagasse from the BA and DIBA treatments.
index	sobs	shannon	simpson	chao	ace	goods_coverage
BA1	473	4.78645	0.93011	582.053	573.621	0.999035
BA2	541	4.44884	0.889088	694.075	720.518	0.998591
BA3	504	4.58454	0.909874	608.73	615.784	0.998941
BA4	505	4.26004	0.859941	588.169	608.144	0.998957
BA5	640	5.39194	0.952131	752.159	755.719	0.998866
DIBA1	499	3.45336	0.767376	601.577	616.474	0.998759
DIBA2	465	3.50332	0.786028	555.38	570.242	0.998779
DIBA3	427	3.48356	0.779617	552.102	557.68	0.998563
DIBA4	466	3.52904	0.79178	622.935	615.534	0.99848
DIBA5	679	4.39584	0.860657	790.333	834.766	0.998182

## Sheet: Table S5
Table S5. Metabolite statistics of bagasse from the BA and DIBA treatments. The relative quantitative according to peak area.
Compounds	Class I	Molecular weight (Da)	Formula	CAS	BA1	BA2	BA3	BA4	BA5	DIBA1	DIBA2	DIBA3	DIBA4	DIBA5
Ribitol-13C5	Carbohydrate	157.11	13C5H12O5	CMS-N0382	67820.6	61951.6	77435.9	78952.7	65168	85849.3	84890.2	95492.8	71585.1	85318.3
Sulfonium, (cyanoamino)diphenyl-, hydroxide, inner salt	Others	226.056	C13H10N2S	55649-89-3	471190	344022	473674	495713	357244	131333	150234	140749	149426	193238
Tetrahydrofurfuryl acrylate	Ester	156.079	C8H12O3	2399-48-6	40386.1	37583.7	37524.8	39412.7	39833.6	48476	45411.6	47271.4	40572.1	49403.7
1-acetyl-2-methyl-Azetidine	Others	113.084	C6H11NO	50837-77-9	383958	399686	381006	410979	391923	479358	452644	449183	435786	482000
carbonic Acid 1	Acid	62	CH2O3	463-79-6	202231	229180	164517	163577	212448	468689	488096	465224	436277	579408
N,N-dimethyl-Carbamic Acid	Acid	89.05	C3H7NO2	7260-94-8	29738.2	33587.1	32902.2	36853.4	34735.9	8746.39	13079.5	12356.6	10416.4	10657.1
carbamic Acid 1	Acid	61.02	CH3NO2	463-77-4	74533	57766.9	60974.9	76829.6	70905.2	72628.9	62035.4	61747.8	60512	53040.1
3,3,5-trimethyl-Heptane	Lipid	142.172	C10H22	7154-80-5	12460.1	9613.1	11562.6	11136.2	11239.4	12997.4	12851.4	15723	13623	12702.7
diethylcarbamic Acid	Acid	117.08	C5H11NO2	24579-70-2	105867	100014	101255	108660	111351	147121	139931	162225	146139	147040
Lactic Acid	Acid	90.032	C3H6O3	50-21-5	91678	87671	75641	74353	91148	302384	289843	328995	296481	292014
4,7-dimethyl-Undecane	Lipid	184.219	C13H28	17301-32-5	33294.6	29349.3	28600.8	33157.8	31807.2	37156.9	36404.3	43711.3	35838.6	38118.6
hydroxy-Acetic Acid	Acid	76.016	C2H4O3	79-14-1	8324	9375	9203	7575	9215	189763	188841	230487	205725	205658
PropylAmine	Amine	59.073	C3H9N	107-10-8	35623.9	32878.1	32410.1	38661.8	37807.2	53015.1	52370.5	60143.8	49408.9	55743.4
Hydroxyurea	Nitrogen compounds	76.027	CH4N2O2	127-07-1	3.79082e+06	4.58184e+06	4.09285e+06	3.87195e+06	4.68879e+06	1.86922e+06	1.85626e+06	2.34004e+06	1.6871e+06	1.86585e+06
3-hydroxy-Butanoic Acid	Acid	104.047	C4H8O3	300-85-6	5977.51	5600.16	4116.95	3740.88	6089.06	66516.4	70680.7	62543.8	59975.7	73897.5
2-(2-Isopropyloxazolidin-3-yl)ethan-1-ol	Heterocyclic compound	159.126	C8H17NO2	28770-01-6	74208	79334.4	63210.2	68472.5	74922.9	145721	139753	171453	135375	131451
3-chloro-1,2-Propanediol	Alcohol	110.013	C3H7ClO2	96-24-2	4718.43	4847.01	4832.93	5031.49	4919.99	5579.42	4491.51	5848.15	5465.89	4417.03
1-(diisopropylphosphino)-3-(diisopropylphosphinyl)-Propane	Others	292.208	C15H34OP2	1000156-39-0	38134.7	29091.4	35672.4	31808.1	32637.3	19743.4	20082.6	24156.3	21814.8	17746.5
Propanedioic Acid 2	Acid	104.011	C3H4O4	141-82-2	1.35006e+06	1.77869e+06	1.54879e+06	1.7636e+06	1.70328e+06	1.4446e+06	1.70589e+06	1.68427e+06	1.3688e+06	1.26454e+06
Dodecane	Lipid	170.203	C12H26	112-40-3	17440.2	17443.1	17595.4	20434.1	16930.4	19987.8	25189.5	22574.2	19068.7	21110.3
4,6-dimethyl-Undecane	Lipid	184.219	C13H28	17312-82-2	9465.07	8712.76	9592.61	7875.99	5913.44	28111.4	25173.9	29163	34568.7	24756.4
4,8-dimethyl-Undecane	Lipid	184.219	C13H28	17301-33-6	7457.58	6247.77	8365.12	7391.59	7316.95	7315.73	9164.64	13124.1	8827.78	7567.55
2,3,7-trimethyl-Decane	Lipid	184.219	C13H28	62238-13-5	23148.3	19646.9	25724	21334.6	26317	27832.1	37051	41115.6	31867.5	30025
Glycerin	Alcohol	92.047	C3H8O3	56-81-5	205049	202194	200920	197297	215388	854490	986528	961916	794094	851258
2,7,10-trimethyl-Dodecane	Lipid	212.25	C15H32	74645-98-0	49957.6	41169.4	49459.7	52774.1	47302.5	53161.4	69998.6	73027.7	51248	56930.5
2,4-dimethyl-Decane	Lipid	170.203	C12H26	2801-84-5	4956.18	3428.49	3374.15	3685.55	3377.61	4701.03	6196.3	6529.5	4716.46	6429.46
Butanedioic Acid	Acid	118.027	C4H6O4	110-15-6	2903.73	3396.88	3176.19	3281.15	3139.84	249986	297691	279036	227074	261830
4,6-dimethyl-Dodecane	Lipid	198.235	C14H30	61141-72-8	23809.7	17907.2	21775.5	23714.1	21852.1	23896.1	34086.2	33623.5	25018.6	27679.2
Fumaric Acid	Acid	116.011	C4H4O4	110-17-8	3906	4419.91	4280.53	4697.93	4722.53	235890	220830	243600	214121	233202
Nonanoic Acid	Acid	158.131	C9H18O2	112-05-0	14915.6	13236.7	11626	11594.9	12112.4	13871.9	12709.5	14196.7	12621.1	15667.4
1-Iodoundecane	Others	282.084	C11H23I	4282-44-4	4746.02	4248.8	4607.99	5103.71	4425.26	5713.5	6091.01	8221.67	6558.52	4965.32
D-(-)-Ribofuranose 2	Carbohydrate	150.05	C5H10O5	613-83-2	7897.5	7811.95	8829.76	10478.2	7307.22	7590.2	7125.69	7833.82	8256.52	6755.63
Tetradecane	Lipid	198.235	C14H30	629-59-4	18699.6	28147.3	18694.4	24490.4	23746.6	31035.2	24408.7	30232	28089.3	22723.8
3,8-dimethyl-Undecane	Lipid	184.219	C13H28	17301-30-3	19389.9	20655.2	16266.1	17194.5	17914.7	16405.6	21206.7	28702.6	26111	18169.3
5-methyl-5-propyl-Nonane	Lipid	184.219	C13H28	17312-75-3	10181.6	12306.9	10807.2	11582.3	10717.8	10327.9	13562.3	20479.2	17369.1	11885.4
2-amino-N-cyclopropylacetamide	Amine	114.08	C5H10N2O	120436-02-4	7591.62	13663.2	6984.15	7725.84	11288.8	53933.3	49753.9	39220	32860.4	24397.4
Oxalic acid isohexyl neopentyl ester	Lipid	244.167	C13H24O4	1000309-73-0	9534.36	9233.4	9601.45	9365.1	9127.5	11435.5	11590.7	14200.3	11298.2	11274.3
Hexadecane	Lipid	226.266	C16H34	544-76-3	81547	72330	75691	87331	80956	89956	91365	108021	84810	90903
diethyl(decyloxy)-Borane	Others	226.247	C14H31BO	1000152-34-3	7771.71	10328	8015	7434	7067.43	11347	7904.34	9775.68	5661.41	9282
2-Piperidinecarboxylic acid	Heterocyclic compound	129.079	C6H11NO2	535-75-1	751.983	1002.86	1533.57	1290.86	877.725	622959	568284	537377	439466	432951
4-Aminobutanoic Acid	Acid	103.063	C4H9NO2	56-12-2	9	9	9	9	9	525968	498850	482618	448999	444945
2,4-Di-tert-butylPhenol 2	Phenol	206.167	C14H22O	96-76-4	209003	186968	232513	221971	213897	239504	269958	313087	225104	207817
Sulfurous acid, 2-ethylhexyl isohexyl ester	Lipid	278.192	C14H30O3S	1000309-19-0	8784.67	8676.58	9026.75	9078.6	10792.9	12860.2	10122.6	12676.5	9423.51	10679.9
D-Galactose 2	Carbohydrate	180.063	C6H12O6	59-23-4	9	9	9	9	9	5621	4890	5785	5682	5765
d-Arabinose 2	Carbohydrate	150.053	C5H10O5	10323-20-3	10707.5	12241.2	9973.59	11313.6	10668.5	817294	750473	910863	760727	730698
Xylulose	Carbohydrate	150.05	C5H10O5	551-84-8	2433.77	2387.98	2332.01	1530.2	1468.27	98977.2	92214.4	103115	94494.6	96088.4
D-Arabinitol 2	Carbohydrate	152.068	C5H12O5	488-82-4	12655.6	12864.8	11612	10927.9	10876.2	308091	287845	332723	295140	360719
Rhamnose	Carbohydrate	164.068	C6H12O5	3615-41-6	6390.18	6165.8	7147.68	7138.24	6921.39	155656	123726	151748	127735	142616
4-hydroxy-Benzonitrile	Aromatics	119.037	C7H5NO	767-00-0	2393.78	3404.7	3627.13	2731.69	3310.73	38101.7	41920.5	38342.4	31646.6	36969
2,3-dihydroxypropyl dihydrogen phosphate	Acid	172.01	C3H9O6P	57-03-4	68305	62573.1	47922.2	48084.5	55695.1	49411.4	50129.5	43364.6	45548.2	44374.8
Vanillic Acid	Acid	168.042	C8H8O4	121-34-6	8980.21	5990.28	5217.57	4754.91	4823.98	896438	933508	874187	860902	762191
Glucose 3	Carbohydrate	180.063	C6H12O6	50-99-7	3164.24	4815.81	5205.49	6263.35	7499.46	6031.5	5645.44	5445.42	6296.47	3826.38
D-Allofuranose	Carbohydrate	180.06	C6H12O6	36468-80-1	3111	3503.59	3467	3810.68	3792	36464.2	45456.2	63675.7	61112.4	52580.1
Tetradecanoic Acid	Acid	228.209	C14H28O2	544-63-8	43933.9	46768.3	42580	45920.4	44010.9	25713.5	25289.4	28014	30809.6	24306.6
Myo-Inositol 1	Alcohol	180.063	C6H12O6	87-89-8	5713	7325	5720	5570	5921	31968	36235	41274.1	44109	32779
Fructose 2	Carbohydrate	180.063	C6H12O6	57-48-7	18438.8	26174.2	13629	14496.7	18065.7	245782	228376	296332	313644	236563
D-Allose 1	Carbohydrate	180.063	C6H12O6	2595-97-3	7081.68	10479.2	6642.57	7304.49	6060.32	330320	349709	374839	421808	318008
D(+)-Talose 1	Carbohydrate	180.063	C6H12O6	2595-98-4	398358	435521	305957	323829	340556	1.76819e+07	1.76388e+07	1.80498e+07	1.85408e+07	1.76725e+07
D-Allose 2	Carbohydrate	180.063	C6H12O6	2595-97-3	73590.6	75835.2	55556.7	59776.4	62891.2	5.8991e+06	5.88938e+06	6.36008e+06	6.74193e+06	5.94325e+06
Sorbitol 1	Carbohydrate	182.079	C6H14O6	50-70-4	284911	287329	200757	180525	201689	1.20681e+07	1.21603e+07	1.24213e+07	1.269e+07	1.22263e+07
1-Hexadecanol	Alcohol	242.261	C16H34O	36653-82-4	10047.6	10854.9	9548.44	10173	8572.61	9557.12	6287.11	8989.91	7674.79	5760.51
Scyllo-Inositol	Alcohol	180.063	C6H12O6	488-59-5	4563.31	4232.65	3213.09	2749.39	3529.47	15696	16992.5	19429	16906.7	16067.6
n-Hexadecanoic Acid	Acid	256.24	C16H32O2	57-10-3	2.42336e+06	2.26148e+06	2.11234e+06	2.36203e+06	2.3525e+06	2.07744e+06	1.89004e+06	2.13473e+06	1.83102e+06	1.84887e+06
N-Acetyl-D-glucosamine 1	Carbohydrate	221.09	C8H15NO6	7512-17-6	2456.69	2383.49	1908.5	2411.03	2785.97	136827	111168	138536	112340	112991
Myo-Inositol 3	Alcohol	180.063	C6H12O6	87-89-8	54651.3	49421.5	39337.4	33474.2	43499.1	535293	437275	566484	466942	455236
9(E),11(E)-Conjugated linoleic acid, ethyl ester	Lipid	308.272	C20H36O2	1000452-08-1	157821	148010	120069	117810	155684	13262.9	12096.7	14905.7	14219.4	14090.2
Galacto-heptulose 2	Carbohydrate	210.074	C7H14O7	3019-74-7	2315.45	2219.31	1845.67	1422.5	2333.54	98770.1	79243	102001	83034.4	82537.7
1-Octadecanol	Alcohol	270.292	C18H38O	112-92-5	16167.9	15511.4	16439.6	17905.2	16143.6	6582.78	6596.59	6477.82	6269.59	8211.24
2-(4'-Methoxyphenyl)-2-(3'-methyl-4'methoxyphenyl)propane	Others	270.162	C18H22O2	1000283-53-6	40735.8	46831.2	58212	52102.6	47113.9	35709	43932.8	41573.8	32568.4	36115.9
D-Mannitol 2	Carbohydrate	182.079	C6H14O6	69-65-8	1251.39	1237.1	1046.96	1398.04	1353.94	106076	135777	136524	113817	140655
3-Trifluoromethylbenzylamine, N,N-dinonyl	Others	427.343	C26H44F3N	1000310-29-7	408872	419137	530531	427735	430492	555457	1.26945e+06	1.39508e+06	1.1025e+06	1.60906e+06
cis-Vaccenic Acid	Acid	282.256	C18H34O2	506-17-2	305192	328575	323558	263824	289489	99428.1	122047	123247	100184	135048
Octadecanoic Acid	Acid	284.272	C18H36O2	57-11-4	1.05125e+06	1.05063e+06	1.00751e+06	976605	939484	1.0396e+06	1.13796e+06	1.22905e+06	949740	1.20748e+06
.alpha.-D-Galactopyranoside, methyl	Carbohydrate	194.079	C7H14O6	3396-99-4	76504.9	84410.3	67429.3	53150.3	63092.3	62147.1	74440.6	77856.9	66641.1	79655.8
Abietic Acid	Acid	302.225	C20H30O2	514-10-3	156984	163002	181639	167903	143759	84554.9	123194	109550	84949.3	168483
(Z)-9-Octadecenamide 1	Amine	281.272	C18H35NO	301-02-0	2.34517e+06	4.71887e+06	3.59607e+06	4.25443e+06	4.33087e+06	4.52431e+06	3.99188e+06	5.29847e+06	3.75784e+06	3.16173e+06
2,3-dihydroxypropyl 12-methyltridecanoate	Lipid	302.25	C17H34O4	10828227	10527.3	19768.4	12659.8	13443.3	20601.1	10467.4	8152.61	9568.31	10192.2	8472.23
3-Trifluoromethylbenzylamine, N,N-diundecyl	Others	483.405	C30H52F3N	1000310-29-9	65519.6	73493.8	70919.1	77407.8	87399.2	58350.7	84165.4	105765	86495.2	122174
(1s,2R,3S,4s,5R,6S)-2,3,4,5,6-pentahydroxycyclohexyl dihydrogen phosphate	Acid	260.03	C6H13O9P	573-35-3	21421	25275.9	23110	20575.9	27714	23867.9	27307	31822.3	27568.7	37924.4
Eicosanoic Acid	Acid	312.303	C20H40O2	506-30-9	19631.8	19752.7	18159.1	19968	21660.2	25963.3	21457.2	24809.7	21605.6	28496.6
Uridine	Heterocyclic compound	244.07	C9H12N2O6	58-96-8	4033.66	3474.85	3107.44	3651.53	3004.75	130245	142860	172694	153246	187800
tetraethylbis[.mu.-(2-methyl-2-propanaminato)]di-Aluminum	Others	314.282	C16H40Al2N2	55902-80-2	18984	18754.9	19951.5	22763.5	21006.8	30920.7	28333.1	38062.9	32526.2	38557.4
Phthalic acid, di(oct-3-yl) ester	Lipid	390.277	C24H38O4	1000377-72-3	15906	14142	14615	15999	14714	13764	12065	17283	12436	13028
1,8-dihydroxy-3-methyl-9,10-Anthracenedione	Ketone	254.058	C15H10O4	481-74-3	66041.5	66757	69253.3	79179.7	62685.4	42153	39400.6	53903.3	49514.6	45217.6
Glycerol 1-palmitate	Ester	330.277	C19H38O4	542-44-9	882034	1.47967e+06	1.02042e+06	1.06731e+06	1.44427e+06	985672	861085	965703	1.20687e+06	831591
4-(2-Methylbutanoyl)Sucrose	Carbohydrate	426.17	C17H30O12	122706131	44887.8	41522.6	26161.2	31153.9	31984.8	8.20199e+06	8.45643e+06	9.23023e+06	9.88366e+06	8.78969e+06
Sucrose	Carbohydrate	342.116	C12H22O11	57-50-1	255860	345812	203756	199712	278540	117596	109574	153687	144535	135974
.beta.-D-galactopyranosyl-4-O-.beta.-D-Glucopyranose 1	Carbohydrate	342.116	C12H22O11	5965-66-2	18262	18254.7	18857	16546.9	16386.4	220104	182543	196291	227070	183394
1,4-Bis-(benzoxazol-2-yl)naphthalene	Heterocyclic compound	362.106	C24H14N2O2	1000370-31-4	1.83775e+06	1.92825e+06	1.38462e+06	1.43083e+06	1.56938e+06	2.51975e+06	1.97168e+06	2.06132e+06	2.3954e+06	2.10446e+06
1,8-Diaminoanthra-9,10-quinone	Aromatics	238.074	C14H10N2O2	129-42-0	66767.7	67541.9	64360.3	65347.1	66767.8	64810.9	59392.5	64872.8	66379.4	60039
1-Tetracosanol 1	Alcohol	354.386	C24H50O	506-51-4	45538.2	50912.6	49597.6	53600.3	49902.7	52850.7	47185.9	49919.4	58899	49164.4
9-Octadecenoic acid (Z)-, 2,3-dihydroxypropyl Ester	Ester	356.293	C21H40O4	111-03-5	11289.9	10871.1	10467.6	11132.3	11192.1	7967.82	8363.45	7912.88	11039.8	8220.91
Octadecanoic acid, 2,3-dihydroxypropyl Ester	Ester	358.308	C21H42O4	123-94-4	789628	1.2062e+06	870097	917124	1.19743e+06	982479	884044	878348	1.11295e+06	797195
.beta.-Gentiobiose octamethyl	Carbohydrate	454.241	C20H38O11	1000394-55-8	9	9	9	9	9	22903.7	34738.8	33358.8	31064.8	32789.5
Tetracosanoic Acid	Acid	368.365	C24H48O2	557-59-5	13534.4	14135.9	13458.5	13870.3	14670.1	65996.3	68174.1	64615.8	71466.9	71247.5
4-(1-methyl-1-phenylethyl)-Phenol	Aromatics	212.12	C15H16O	599-64-4	31237.1	36393	41665.7	34815.7	33872.6	36575.5	40118.6	36248.4	39547.6	42718.2
Ergosterol	Alcohol	396.339	C28H44O	57-87-4	305763	348665	369676	343622	320584	160085	145743	135422	137003	171999
Campesterol	Alcohol	400.371	C28H48O	474-62-4	96602.5	121580	117819	117151	99212.5	200159	167057	157530	162207	205931
Stigmasterol 2	Alcohol	412.371	C29H48O	83-48-7	56096.1	57871.8	70451.5	65093.2	54797.2	29871.5	26882.6	26238.3	27018.9	35761.3
.beta.-Sitosterol 1	Alcohol	414.386	C29H50O	83-46-5	314603	310089	338666	351724	298452	117796	111502	106342	110739	140375

## Sheet: Table S6
Table S6. Concentrations of carbohydrate metabolites in BA and DIBA samples. The unit according to peak area. "N/A" means not detected.
Compounds	Class	Molecular Weight	Formula	CAS	BA1	BA2	BA3	BA4	BA5	DIBA1	DIBA2	DIBA3	DIBA4	DIBA5
Lactose	disaccharide	342.116215	C12H22O11	63-42-3	N/A	N/A	N/A	N/A	N/A	N/A	N/A	N/A	N/A	N/A
Cellobiose	disaccharide	342.116215	C12H22O11	528-50-7	N/A	N/A	N/A	N/A	N/A	0.0264689456	0.0269235854	0.0259767103	0.0229281592	0.0248113943
Trehalose	disaccharide	342.116215	C12H22O11	99-20-7	1.88913246	1.74030512	1.94114478	1.99630435	1.96831109	2.07753491	2.80859289	2.8696361	1.46915224	1.60747826
Sucrose	disaccharide	342.116215	C12H22O11	57-50-1	0.0265057634	0.0225972832	0.0246522367	0.0239772727	0.0244393377	0.00631688012	0.00668410616	0.0066872198	0.00701771144	0.00661143428
Maltose	disaccharide	342.116215	C12H22O11	69-79-4	0.00689233569	0.00737295716	0.00739434343	0.00745128458	0.00794063221	0.0210547906	0.0216594892	0.0206622028	0.0184676219	0.0209645177
Phenylglucoside	disaccharide	256.09469	C12H16O6	1464-44-4	N/A	N/A	N/A	N/A	N/A	N/A	N/A	N/A	N/A	N/A
D-Ribono-1,4-lactone	monosaccharide	148.037175	C5H8O5	5336-08-3	N/A	N/A	N/A	N/A	N/A	N/A	N/A	N/A	N/A	N/A
Barium D-ribose-5-phosphate	monosaccharide	228.003507	C5H9BaO8P	15673-79-7	N/A	N/A	N/A	N/A	N/A	N/A	N/A	N/A	N/A	N/A
D-Galacturonic acid	monosaccharide	194.042655	C6H10O7	685-73-4	N/A	N/A	N/A	N/A	N/A	N/A	N/A	N/A	N/A	N/A
D-Sorbitol	monosaccharide	182.07904	C6H14O6	50-70-4	N/A	N/A	N/A	N/A	N/A	N/A	N/A	N/A	N/A	N/A
2-Acetamido-2-deoxy-D-glucopyranose	monosaccharide	221.089939	C8H15NO6	7512-17-6	N/A	N/A	N/A	N/A	N/A	N/A	N/A	N/A	N/A	N/A
Methyl beta-D-galactopyranoside	monosaccharide	194.07904	C7H14O6	1824-94-8	N/A	N/A	N/A	N/A	N/A	N/A	N/A	N/A	N/A	N/A
D-Mannose-6-phosphate sodium salt	monosaccharide	273.024971	C6H12NaO9P	70442-25-0	N/A	N/A	N/A	N/A	N/A	N/A	N/A	N/A	N/A	N/A
Levoglucosan	monosaccharide	162.052825	C6H10O5	498-07-7	N/A	N/A	N/A	N/A	N/A	N/A	N/A	N/A	N/A	N/A
2-Deoxy-D-ribose	monosaccharide	134.05791	C5H10O4	533-67-5	N/A	N/A	N/A	N/A	N/A	N/A	N/A	N/A	N/A	N/A
D-Ribose	monosaccharide	150.052825	C5H10O5	50-69-1	N/A	N/A	N/A	N/A	N/A	N/A	N/A	N/A	N/A	N/A
L-Fucose	monosaccharide	164.068475	C6H12O5	2438-80-4	N/A	N/A	N/A	N/A	N/A	N/A	N/A	N/A	N/A	N/A
1,5-Anhydroglucitol	monosaccharide	164.068475	C6H12O5	154-58-5	0.0159688979	0.0193015047	0.0175909572	0.0210142292	0.0182224987	0.0166139432	0.0172622934	0.0169750995	0.0169190448	0.0154776412
Deoxyglucose	monosaccharide	164.068475	C6H12O5	154-17-6	N/A	N/A	N/A	N/A	N/A	N/A	N/A	N/A	N/A	N/A
D-Xylulose	monosaccharide	150.052825	C5H10O5	551-84-8	0.00234192113	0.0023322675	0.00254510823	0.00257577075	0.00277587556	0.00315545498	0.00331825739	0.00300064047	0.00313560199	0.0028672064
D-Xylose	monosaccharide	150.052825	C5H10O5	58-86-6	0.00759755308	0.00775809822	0.00712758057	0.00741181818	0.00747907677	0.0168915551	0.017068643	0.016728132	0.0157532935	0.0166454573
Xylitol	monosaccharide	152.068475	C5H12O5	87-99-0	0.00451150657	0.00472225705	0.00436525253	0.00441106719	0.00450980432	0.00672930188	0.00683963946	0.00654206696	0.00638861692	0.00667884058
L-Rhamnose	monosaccharide	164.068475	C6H12O5	3615-41-6	0.0075071183	0.00774810867	0.00718222222	0.00739656126	0.00753067737	0.00740154068	0.00769029544	0.00752630762	0.00767763184	0.00775778111
Inositol	monosaccharide	180.06339	C6H12O6	87-89-8	0.0107771486	0.0106340648	0.0103024723	0.010903834	0.0107893427	0.0134801926	0.013690696	0.0143027268	0.0126699104	0.0128244478
D-Glucuronic acid	monosaccharide	194.042655	C6H10O7	6556-12-3	0.00615379171	0.00642033438	0.00611143819	0.00635450593	0.006190286	0.00603012037	0.00619242864	0.00593063561	0.00603677612	0.0060232084
Glucose	monosaccharide	180.06339	C6H12O6	50-99-7	0.0271187058	0.0256743992	0.0289427609	0.0279003953	0.0284070246	0.494815599	0.565277917	0.530897623	0.467010945	0.49217991
D-Fructose	monosaccharide	180.06339	C6H12O6	7660-25-5	0.00263688574	0.00276802508	0.00293394901	0.00257529644	0.00283769192	0.00409544535	0.00501638458	0.00505630277	0.0042721194	0.00457687156
D-Arabinose	monosaccharide	150.052825	C5H10O5	10323-20-3	0.00828895854	0.00850244514	0.00783611352	0.00804673913	0.0081816558	0.00928637458	0.00970850275	0.00930550218	0.00943096517	0.00962934533
D-Arabinitol	monosaccharide	152.068475	C5H12O5	488-82-4	0.00659549039	0.00599477534	0.00550097162	0.00658181818	0.0065609433	0.0067082908	0.00637293941	0.00638358079	0.006268	0.00611176412
D-Mannose	monosaccharide	180.06339	C6H12O6	3458-28-4	N/A	N/A	N/A	N/A	N/A	0.0115558402	0.0126676014	0.0118588646	0.0117556418	0.012244078
D-Galactose	monosaccharide	180.06339	C6H12O6	59-23-4	N/A	N/A	N/A	N/A	N/A	0.00912261916	0.00954665999	0.00906325085	0.00918539303	0.00910498751
Raffinose	trisaccharide	504.16904	C18H32O16	512-69-6	N/A	N/A	N/A	N/A	N/A	N/A	N/A	N/A	N/A	N/A

## Sheet: Table S7
Table S7. Concentrations of metabolism–related metabolites in BA and DIBA samples. The unit according to peak area."N/A" means not detected.
Compounds	Class	Molecular Weight	Formula	CAS	BA1	BA2	BA3	BA4	BA5	DIBA1	DIBA2	DIBA3	DIBA4	DIBA5
L-Aspartate	Amino Acid metabolomics	133.103	C4H7NO4	56-84-8	N/A	N/A	N/A	N/A	N/A	N/A	N/A	N/A	N/A	N/A
Glutamine	Amino acid derivatives	146.069143	C5H10N2O3	56-85-9	83.7046309	114.316967	200.649217	71.4471528	259.321414	2875.92996	2905.69035	2882.38545	3004.75715	3456.60118
Lysine	Amino acids	146.105528	C6H14N2O2	56-87-1	N/A	N/A	N/A	N/A	N/A	N/A	N/A	N/A	N/A	N/A
L-Asparagine	Amino acids	132.053493	C4H8N2O3	70-47-3	N/A	N/A	N/A	N/A	N/A	1167.42184	1091.8833	1087.86174	1140.58565	1430.30452
L-Alanine	Amino acids	89.04767847	C3H7NO2	56-41-7	N/A	N/A	N/A	N/A	N/A	4532.97388	4266.88812	3535.07838	4466.45013	5191.33595
L-citrulline	Amino acids	175.095692	C6H13N3O3	372-75-8	N/A	N/A	N/A	N/A	N/A	N/A	N/A	N/A	N/A	N/A
L-Leucine	Amino acids	131.094629	C6H13NO2	61-90-5	514.569563	702.901406	705.589448	582.48771	790.394113	2481.55916	2437.96457	2307.92805	2586.12832	2434.6169
L-Cystine	Amino acids	240.023848	C6H12N2O4S2	56-89-3	N/A	N/A	N/A	N/A	N/A	N/A	N/A	N/A	N/A	N/A
Ornithine	Amino acids	132.089878	C5H12N2O2	3184-13-2	N/A	N/A	N/A	N/A	N/A	N/A	N/A	N/A	N/A	N/A
Arginine	Amino acids	174.111676	C6H14N4O2	74-79-3	916.07362	771.694714	720.344188	828.382835	835.817859	1708.91373	1709.01213	1897.94011	1866.74995	1619.85265
Serine	Amino acids	105.042594	C3H7NO3	56-45-1	N/A	N/A	N/A	N/A	N/A	2603.87812	2341.8833	2504.73272	2632.75035	2821.9057
L-Glutamic-acid	Amino acids	147.053159	C5H9NO4	56-86-0	N/A	N/A	N/A	N/A	N/A	N/A	N/A	N/A	N/A	N/A
Threonine	Amino acids	119.058244	C4H9NO3	72-19-5	35.1932515	37.5522669	66.0357585	22.3149324	88.6431252	2188.82074	2058.41517	2039.4996	2318.57885	2352.50491
Tyrosine	Amino acids	181.0738932	C9H11NO3	60-18-4	213.0566	244.100178	287.673124	255.483408	334.698736	3729.63989	3200.89544	3016.86093	3769.58825	3033.43811
Xylulose-5-phosphate	Carbohydrate metabolomics	230.11	C3H7NO3	4212-65-1	N/A	N/A	N/A	N/A	N/A	N/A	N/A	N/A	N/A	N/A
Flavin-mononucleotide	CoEnzyme and vitamins	456.1046148	C17H21N4O9P	146-17-8	N/A	N/A	N/A	N/A	N/A	N/A	N/A	N/A	N/A	N/A
Succinyl-CoA	CoEnzyme and vitamins	867.1312524	C25H40N7O19P3S	604-98-8	N/A	N/A	N/A	N/A	N/A	N/A	N/A	N/A	N/A	N/A
Acetyl-CoA	CoEnzyme and vitamins	809.125779	C23H38N7O17P3S	72-89-9	N/A	N/A	N/A	N/A	N/A	N/A	N/A	N/A	N/A	N/A
Phosphorylethanolamine	LPE	141.019096	C2H8NO4P	1071-23-4	N/A	N/A	N/A	N/A	N/A	N/A	N/A	N/A	N/A	N/A
dTMP	Nucleotide and Its metabolomics	322.208	C10H15N2O8P	33430-62-5	N/A	N/A	N/A	N/A	N/A	N/A	N/A	N/A	N/A	N/A
Guanosine-diphosphate	Nucleotide and Its metabolomics	443.024334	C10H15N5O11P2	146-91-8	N/A	N/A	N/A	N/A	N/A	N/A	N/A	N/A	N/A	N/A
ATP	Nucleotide and Its metabolomics	506.995751	C10H16N5O13P3	56-65-5	N/A	N/A	N/A	N/A	N/A	N/A	N/A	N/A	N/A	N/A
UMP	Nucleotide and Its metabolomics	324.03587	C9H13N2O9P	58-97-9	N/A	N/A	N/A	N/A	N/A	N/A	N/A	N/A	N/A	N/A
IMP	Nucleotide and Its metabolomics	348.047103	C10H13N4O8P	131-99-7	N/A	N/A	N/A	N/A	N/A	N/A	N/A	N/A	N/A	N/A
dUMP	Nucleotide and Its metabolomics	308.0409519	C9H13N2O8P	964-26-1	N/A	N/A	N/A	N/A	N/A	N/A	N/A	N/A	N/A	N/A
dAMP	Nucleotide and Its metabolomics	331.068172	C10H14N5O6P	653-63-4	N/A	N/A	N/A	N/A	N/A	N/A	N/A	N/A	N/A	N/A
dCMP	Nucleotide and Its metabolomics	307.056939	C9H14N3O7P	1032-65-1	N/A	N/A	N/A	N/A	N/A	N/A	N/A	N/A	N/A	N/A
AMP	Nucleotide and Its metabolomics	347.063087	C10H14N5O7P	61-19-8	N/A	N/A	N/A	N/A	N/A	N/A	N/A	N/A	N/A	N/A
UDP-GlcNAc	Nucleotide and Its metabolomics	607.0815695	C17H27N3O17P2	528-04-1	N/A	N/A	N/A	N/A	N/A	106.197072	103.981321	107.982315	111.224265	104.739686
Cyclic-AMP	Nucleotide and Its metabolomics	329.052522	C10H12N5O6P	60-92-4	N/A	N/A	N/A	N/A	N/A	N/A	N/A	N/A	N/A	N/A
c-di-AMP	Nucleotide and Its metabolomics	658.105044	C20H24N10O12P2	54447-84-6	N/A	N/A	N/A	N/A	N/A	N/A	N/A	N/A	N/A	N/A
Uracil	Nucleotide and Its metabolomics	112.027278	C4H4N2O2	66-22-8	324.519098	336.12453	336.232481	360.08603	349.789609	144.073011	133.470056	136.033963	141.925844	107.074656
Dihydronicotinamide-adenine-dinucleotide-phosphate(NADPH)	Nucleotide and Its metabolomics	745.0911021	C21H30N7O17P3	53-57-6	N/A	N/A	N/A	N/A	N/A	N/A	N/A	N/A	N/A	N/A
Guanosine	Nucleotide and Its metabolomics	283.09167	C10H13N5O5	118-00-3	116.550564	116.586814	171.234542	116.921344	155.776373	1303.88801	1242.74986	1212.01768	1320.45773	1205.30452
ADP	Nucleotide and Its metabolomics	427.029419	C10H15N5O10P2	58-64-0	N/A	N/A	N/A	N/A	N/A	N/A	N/A	N/A	N/A	N/A
NicotinaMide-adenine-dinucleotide(NAD)	Nucleotide and Its metabolomics	663.425	C21H27N7O14P2	53-84-9	N/A	N/A	N/A	N/A	N/A	N/A	N/A	N/A	N/A	N/A
Adenine	Nucleotide and Its metabolomics	135.054495	C5H5N5	73-24-5	349.811003	358.185508	380.766694	385.531544	381.699921	2024.32727	2032.19719	1955.60691	2058.97462	1924.95088
Inosine	Nucleotide and Its metabolomics	268.080771	C10H12N4O5	58-63-9	79.1984959	75.4624827	93.1629225	83.2997747	103.296128	197.84626	194.769883	185.288384	200.810514	178.888998
3-phenyllactic-acid	Organic acid And Its Derivatives	166.0629942	C9H10O3	828-01-3	N/A	N/A	N/A	N/A	N/A	N/A	N/A	N/A	N/A	N/A
Malic-acid	Organic acid And Its derivatives	134.0215233	C4H6O5	6915-15-7	N/A	N/A	N/A	N/A	N/A	N/A	N/A	N/A	N/A	N/A
Oxaloacetate	Organic acid And Its derivatives	132.0058732	C4H4O5	328-42-7	N/A	N/A	N/A	N/A	N/A	207.210131	253.857115	293.526929	299.952029	206.528487
cis-Aconitic-acid	Organic acid And Its derivatives	174.11	C6H6O6	585-84-2	N/A	N/A	N/A	N/A	N/A	N/A	N/A	N/A	N/A	N/A
Argininosuccinic-acid	Organic acid And Its derivatives	290.122636	C10H18N4O6	2387-71-5	N/A	N/A	N/A	N/A	N/A	N/A	N/A	N/A	N/A	N/A
Itaconic-acid	Organic acid And Its derivatives	130.1	C5H6O4	97-65-4	N/A	N/A	N/A	N/A	N/A	N/A	N/A	N/A	N/A	N/A
Fumaric-acid	Organic acid And Its derivatives	116.01096	C4H4O4	110-17-8	N/A	N/A	N/A	N/A	N/A	N/A	N/A	N/A	N/A	N/A
Succinic Acid	Organic acid And Its derivatives	118.02661	C4H6O4	110-15-6	251.5377	172.324292	235.080379	196.2034	224.598973	477.495053	508.437319	200.008039	467.61643	265.920432
Alpha-Ketoglutaric-Acid	Organic acid And Its derivatives	146.021525	C5H6O5	328-50-7	N/A	N/A	N/A	N/A	N/A	N/A	N/A	N/A	N/A	N/A
Pyruvic-acid	Organic acid And Its derivatives	88.016045	C3H4O3	127-17-3	N/A	N/A	N/A	N/A	N/A	N/A	N/A	N/A	N/A	N/A
Isocitric-acid	Organic acid And Its derivatives	192.027005	C6H8O7	320-77-4	N/A	N/A	N/A	N/A	N/A	N/A	N/A	N/A	N/A	N/A
Citric-acid	Organic acid And Its derivatives	192.027005	C6H8O7	77-92-9	N/A	N/A	N/A	N/A	N/A	N/A	N/A	N/A	N/A	N/A
Lactate	Organic acid And Its derivatives	90.031695	C3H6O3	50-21-5	N/A	N/A	N/A	N/A	N/A	N/A	N/A	N/A	N/A	N/A
D-Erythrose 4-phosphate	Phosphate sugars	200.008592	C4H9O7P	585-18-2	N/A	N/A	N/A	N/A	N/A	N/A	N/A	N/A	N/A	N/A
Trehalose-6-phosphate	Phosphate sugars	422.082547	C12H23O14P	4484-88-2	N/A	N/A	N/A	N/A	N/A	N/A	N/A	N/A	N/A	N/A
D(+)-Glucose	Phosphate sugars	180.0633881	C6H12O6	492-62-6	16486.2458	18932.8846	22074.4023	19880.7866	21214.5397	381739.216	388733.873	400531.551	347066.76	397384.086
6-Phosphogluconic-acid	Phosphate sugars	276.024637	C6H13O10P	921-62-0	N/A	N/A	N/A	N/A	N/A	N/A	N/A	N/A	N/A	N/A
D-Fructose-6-phosphate	Phosphate sugars	260.0297185	C6H13O9P	26177-86-9	N/A	N/A	N/A	N/A	N/A	N/A	N/A	N/A	N/A	N/A
D-Glucose-6-phosphate	Phosphate sugars	260.029722	C6H13O9P	56-73-5	N/A	N/A	N/A	N/A	N/A	N/A	N/A	N/A	N/A	N/A
D-Ribulose-5-phosphate	Phosphate sugars	230.0191538	C5H11O8P	4151-19-3	N/A	N/A	N/A	N/A	N/A	N/A	N/A	N/A	N/A	N/A
Fructose-1,6-bisphosphate	Phosphate sugars	339.996054	C6H14O12P2	34693-15-7	N/A	N/A	N/A	N/A	N/A	N/A	N/A	N/A	N/A	N/A
D-Glucose-1-phosphate	Phosphate sugars	260.0297185	C6H13O9P	59-56-3	N/A	N/A	N/A	N/A	N/A	N/A	N/A	N/A	N/A	N/A
Sedoheptulose-7-phosphate	Phosphate sugars	290.0402837	C7H15O10P	2646-35-7	N/A	N/A	N/A	N/A	N/A	N/A	N/A	N/A	N/A	N/A
BPG	Phosphoric acids	265.9592695	C3H8O10P2	138-81-8	N/A	N/A	N/A	N/A	N/A	N/A	N/A	N/A	N/A	N/A
Glycerol-3-phosphate	Phosphoric acids	172.013677	C3H9O6P	57-03-4	N/A	N/A	N/A	N/A	N/A	N/A	N/A	N/A	N/A	N/A
Phosphoenolpyruvic-acid	Phosphoric acids	167.982377	C3H5O6P	138-08-9	N/A	N/A	N/A	N/A	N/A	N/A	N/A	N/A	N/A	N/A
3-phosphoglycerate	Phosphoric acids	18606	C3H7O7P	820-11-1	N/A	N/A	N/A	N/A	N/A	N/A	N/A	N/A	N/A	N/A
Dihydroxyacetone-phosphate	Phosphoric acids	169.998027	C3H7O6P	57-04-5	N/A	N/A	N/A	N/A	N/A	N/A	N/A	N/A	N/A	N/A
Glyceraldehyde-3-phosphate	Phosphoric acids	170.058	C3H7O6P	93965-35-6	N/A	N/A	N/A	N/A	N/A	N/A	N/A	N/A	N/A	N/A
2-Phospho-D-glyceric acid	Phosphoric acids	185.9929391	C3H7O7P	3443-57-0	N/A	N/A	N/A	N/A	N/A	N/A	N/A	N/A	N/A	N/A
